# Supplementary material for: Identification and evaluation of an appropriate housekeeping gene for real-time gene profiling of hepatocellular carcinoma cells cultured in three-dimensional scaffold
Source: Research Square preprint supplement (doi:10.21203/rs.3.rs-490561/v1), 2021-05-17
Supplement: Supplementary file 1 [file d56e5409a71472621b4a6f36.docx]

**Supplementary Information**

**Table 1: The mean threshold cycle values of housekeeping genes obtained for 2D and 3D culture at different time intervals.**

| **Gene** | **Mean** | **95% Class Interval** | |
| --- | --- | --- | --- |
| **Min Ct** | **Max Ct** |
| GAPDH  β-actin  PPIA  RPL-13  18S rRNA  Β2M | 25  29  27  25  14  21 | 22.8  26.2  25.2  24.2  13.0  20.0 | 27.52  31.8  28.8  25.8  15.2  22.1 |

**Table 2: Stability value obtained by NormFinder software for 2D and 3D cultures.**

| **Ranking order** | **Gene** | **Stability value** |
| --- | --- | --- |
| 1 | RPL-13 | 0.033 |
| 2 | B2M | 0.035 |
| 3 | 18S rRNA | 0.089 |
| 4 | PPIA | 0.11 |
| 5 | GAPDH | 0.126 |
| 6 | ACTB | 0.14 |

**Table 3: Stability value obtained by GeNorm software for 3D culture**

| **Ranking order** | **Gene** | **Stability value (M)** |
| --- | --- | --- |
| 1 | B2M | 0.7 |
| 2 | 18S rRNA | 0.9 |
| 3 | RPL-13 | 0.95 |
| 4 | PPIA | 1.59 |
| 5 | GAPDH | 2.8 |
| 6 | ACTB | 3.29 |
